# Supplementary material for: Long-range ordering and local structural disordering of BiAgSe2 and BiAgSeTe thermoelectrics
Source: Royal Society of Chemistry journal article supplement (doi:10.1039/d1cp03676a), 2021-01-01
Supplement: d1cp03676a1.pdf [file d1cp03676a1.pdf]

## Long-range ordering and local structural disordering of BiAgSe<sub>2</sub> and BiAgSeTe thermoelectric

Weifeng Huang <sup>a</sup>, Yingcai Zhu<sup>b</sup>, Yong Liu<sup>c\*</sup>, Shi Tao <sup>d</sup>, Changchun Yang <sup>a</sup>, Qianshun Diao<sup>b</sup>, Zhen Hong<sup>b</sup>, Haijiao Han<sup>b</sup>, Lijuan Liu <sup>e</sup>, Wei Xu <sup>b\*</sup>

<sup>a</sup> School of Electronic Engineering, Jiujiang University, Jiujiang, 332005, China

<sup>b</sup> Beijing Synchrotron Radiation Facility, Institute of High Energy Physics Chinese Academy of Sciences, Beijing, 100049, China.

<sup>c</sup> Foshan (Southern China) Institute for New Materials, Foshan, 528200, Guangdong, P. R. China

<sup>d</sup> School of Electronic and Information Engineering, Jiangsu Laboratory of Advanced Functional Materials, Changshu Institute of Technology, Changshu 215500, China

<sup>e</sup> School of Physics and Microelectronics, Zhengzhou University, Zhengzhou, Henan 450001, China

Table.S1 Crystallographic information of BiAgSe<sub>2</sub>, BiAgTe<sub>2</sub>, Bi<sub>2</sub>Se<sub>3</sub>

|                                                     |                                                                                                                  |          |       |            |              |
|-----------------------------------------------------|------------------------------------------------------------------------------------------------------------------|----------|-------|------------|--------------|
| <b>BiAgSe<sub>2</sub>-<math>\alpha</math>-phase</b> | <i>Pm</i> $\bar{3}$ 1, SG. No.164, a=b=4.18 Å, c= 19.67Å<br>$\alpha=\beta=90^\circ$ , $\gamma=120^\circ$         |          |       |            |              |
|                                                     | x                                                                                                                | y        | z     | Occupation | Wyckoff site |
| <b>Ag</b>                                           | 0                                                                                                                | 0        | 0     | 1          | 1a           |
| <b>Bi</b>                                           | 0                                                                                                                | 0        | 0.5   | 1          | 1b           |
| <b>Ag</b>                                           | 0.333333                                                                                                         | 0.666667 | 0.672 | 1          | 2d           |
| <b>Bi</b>                                           | 0.333333                                                                                                         | 0.666667 | 0.163 | 1          | 2d           |
| <b>Se</b>                                           | 0                                                                                                                | 0        | 0.253 | 1          | 2c           |
| <b>Se</b>                                           | 0.333333                                                                                                         | 0.666667 | 0.926 | 1          | 2d           |
| <b>Se</b>                                           | 0.333333                                                                                                         | 0.666667 | 0.406 | 1          | 2d           |
| <b>BiAgSe<sub>2</sub>-<math>\beta</math>-phase</b>  | <i>R</i> $\bar{3}$ <i>m</i> , SG No.166, a=b= 4.201Å, c=18.865 Å<br>$\alpha=\beta=90^\circ$ , $\gamma=120^\circ$ |          |       |            |              |
|                                                     | x                                                                                                                | y        | z     | Occupation | Wyckoff site |
| <b>Ag</b>                                           | 0                                                                                                                | 0        | 0     | 1          | 3a           |
| <b>Bi</b>                                           | 0                                                                                                                | 0        | 0.5   | 1          | 3b           |
| <b>Se</b>                                           | 0                                                                                                                | 0        | 0.254 | 1          | 6c           |
| <b>BiAgSe<sub>2</sub>-<math>\gamma</math>-phase</b> | <i>Fm</i> $\bar{3}$ <i>m</i> , SG No.225, a=b= 5.832Å<br>$\alpha=\beta=90^\circ$ , $\gamma=120^\circ$            |          |       |            |              |
|                                                     | x                                                                                                                | y        | z     | Occupation | Wyckoff site |
| <b>Ag</b>                                           | 0                                                                                                                | 0        | 0     | 0.5        | 4a           |
| <b>Se</b>                                           | 0.5                                                                                                              | 0.5      | 0.5   | 1          | 4b           |
| <b>Bi</b>                                           | 0                                                                                                                | 0        | 0     | 0.5        | 4a           |
| <b>BiAgTe<sub>2</sub></b>                           | <i>R</i> $\bar{3}$ <i>m</i> , SG No.166, a=b= 4.453Å, c=20.954 Å<br>$\alpha=\beta=90^\circ$ , $\gamma=120^\circ$ |          |       |            |              |
|                                                     | x                                                                                                                | y        | z     | Occupation | Wyckoff site |
| <b>Ag</b>                                           | 0                                                                                                                | 0        | 0     | 1          | 3a           |
| <b>Bi</b>                                           | 0                                                                                                                | 0        | 0.5   | 1          | 3b           |
| <b>Te</b>                                           | 0                                                                                                                | 0        | 0.744 | 1          | 6c           |

\*Correspondence should be addressed to [xuw@mail.ihep.ac.cn](mailto:xuw@mail.ihep.ac.cn) and [liuy08@qq.com](mailto:liuy08@qq.com)

| <b>Bi<sub>2</sub>Se<sub>3</sub></b> |   | <i>R</i> $\bar{3}$ <i>m</i> , SG No.166, a=b= 4.191Å, c=29.929Å |       |            |              |
|-------------------------------------|---|-----------------------------------------------------------------|-------|------------|--------------|
|                                     |   | $\alpha=\beta=90^\circ, \gamma=120^\circ$                       |       |            |              |
|                                     | x | y                                                               | z     | Occupation | Wyckoff site |
| <b>Bi</b>                           | 0 | 0                                                               | 0.398 | 1          | 6c           |
| <b>Se</b>                           | 0 | 0                                                               | 0.216 | 1          | 6c           |
| <b>Se</b>                           | 0 | 0                                                               | 0     | 1          | 3a           |

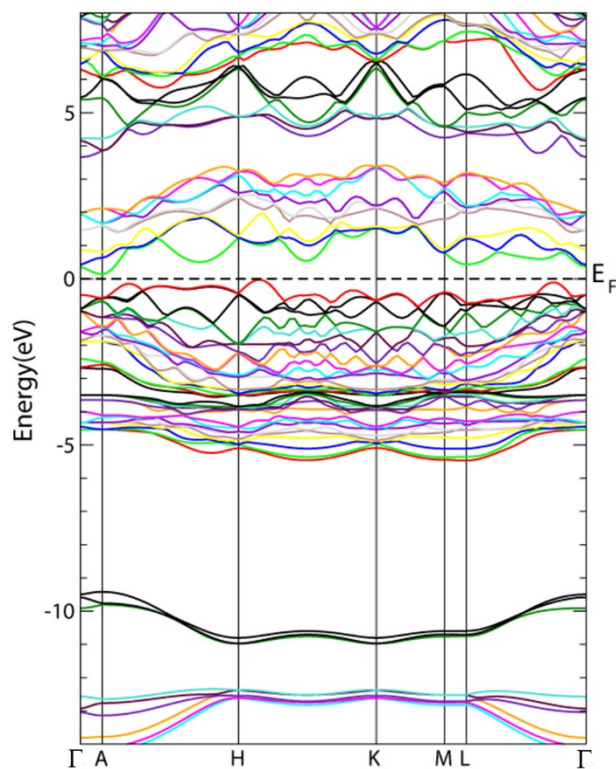

Figure.S1 Electronic band structure of  $\alpha$ -BiAgSe<sub>2</sub>

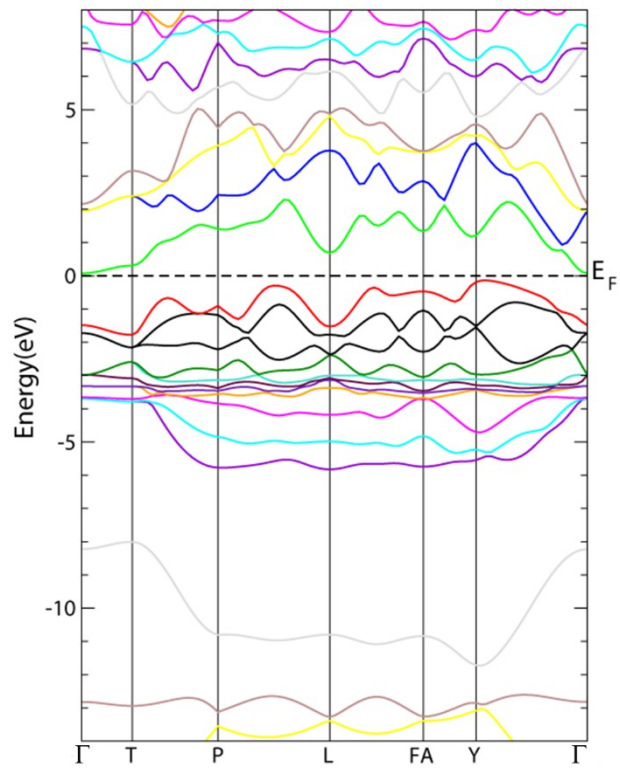

Figure.S2 Electronic band structure of  $\beta$ -BiAgSe<sub>2</sub>

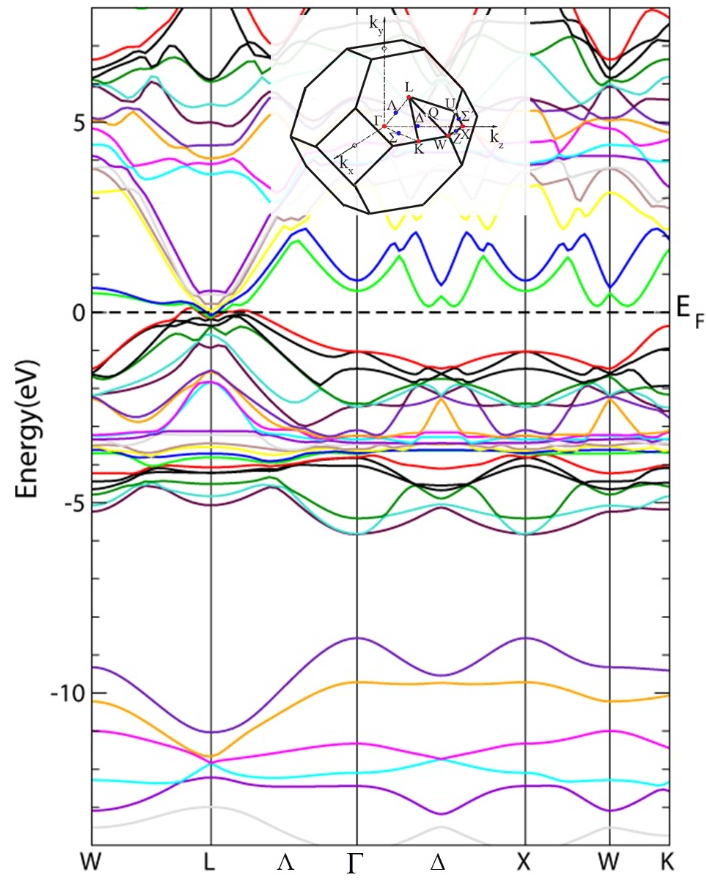

Fig.S3 Electronic Band structure of cubic BiAgSeTe; the inset figure shows the first Brillouin zone (BZ) of BiAgSeTe with high-symmetry points (red points) for calculations.

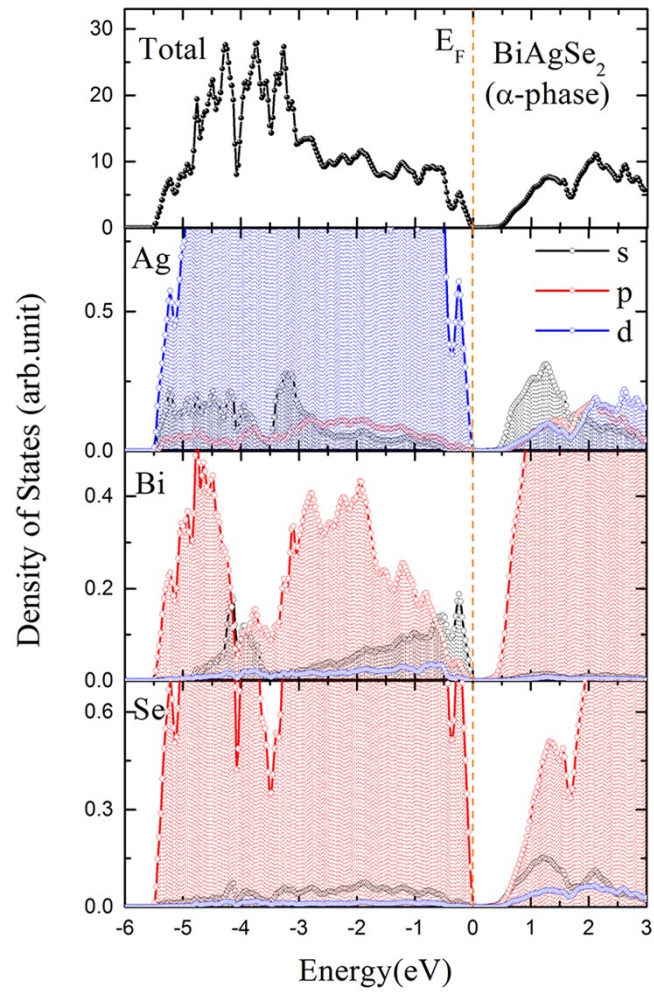

Figure.S4 Projected partial density of electronic states for  $\alpha$ -phase  $\text{BiAgSe}_2$

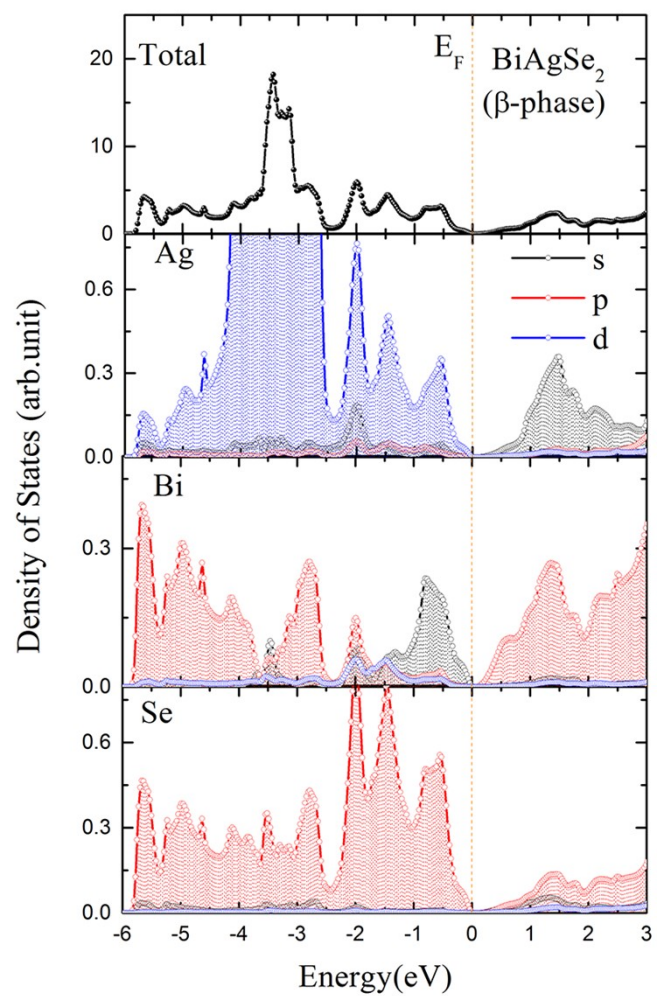

Figure.S5 Projected partial density of electronic states for  $\beta$ -phase  $\text{BiAgSe}_2$

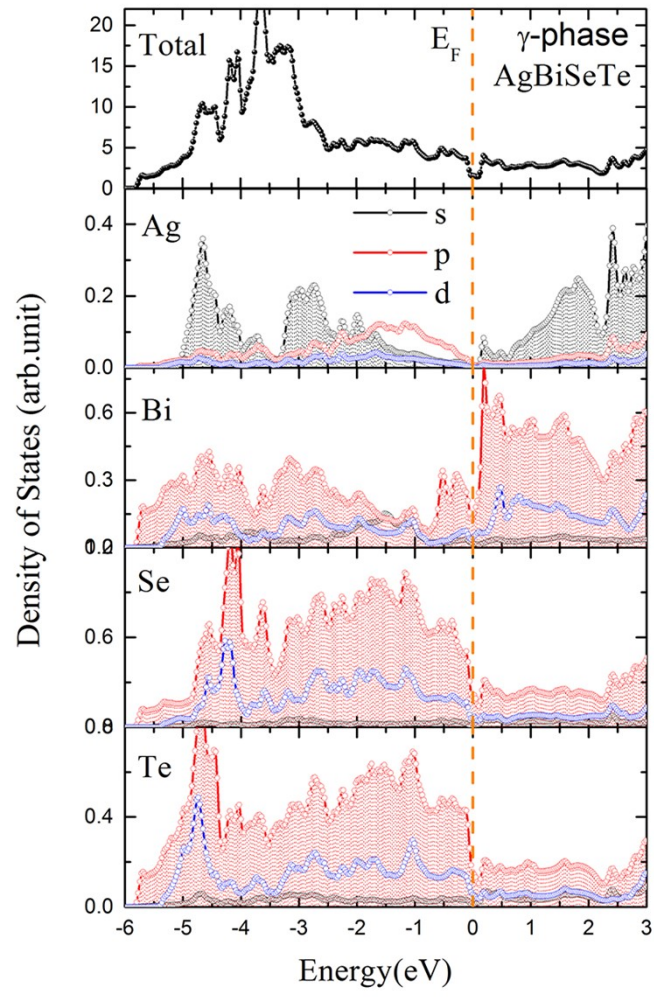

Figure.S6 Projected partial density of electronic states for  $\gamma$ -phase BiAgSeTe



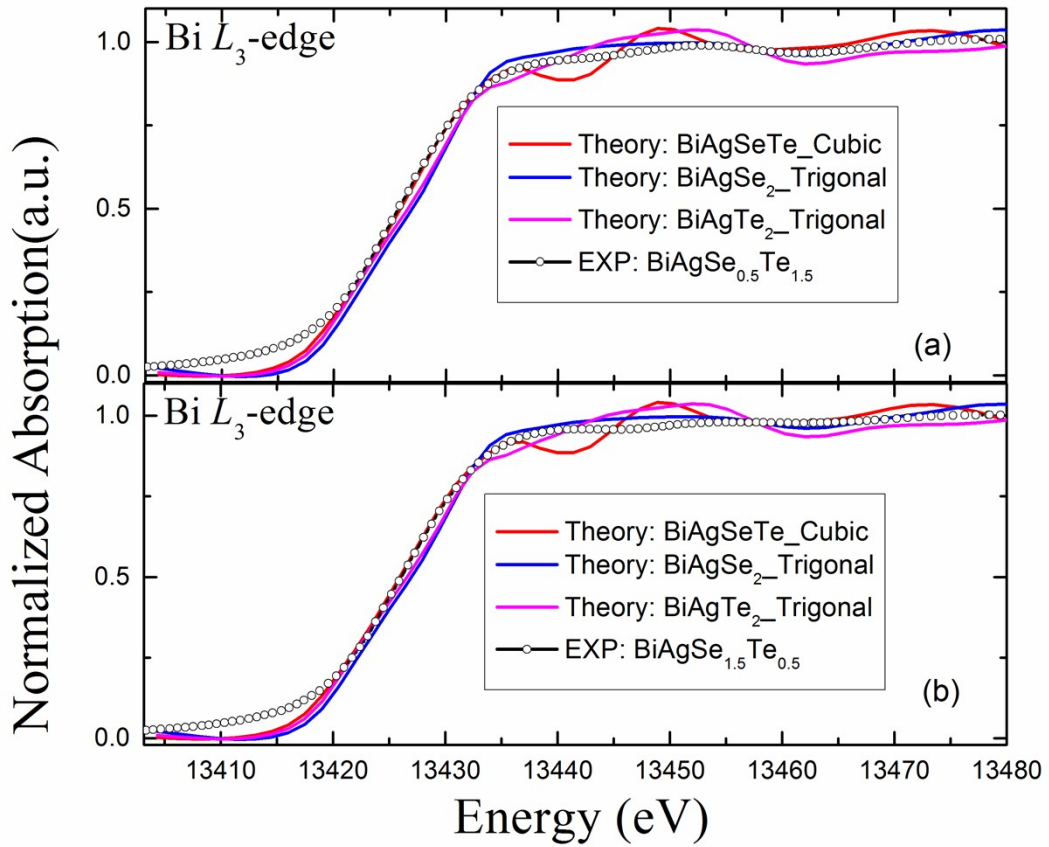

Figure.S7 Comparison of experimental and theoretical XANES spectra at Bi  $L_3$ -edge for (a)  $\text{BiAgSe}_{0.5}\text{Te}_{1.5}$ , (b)  $\text{BiAgSe}_{1.5}\text{Te}_{0.5}$ . Note that hexagonal structures were used  $\text{BiAgSe}_2$  and  $\text{BiAgTe}_2$  models while cubic structure was used for  $\text{BiAgSeTe}$ .

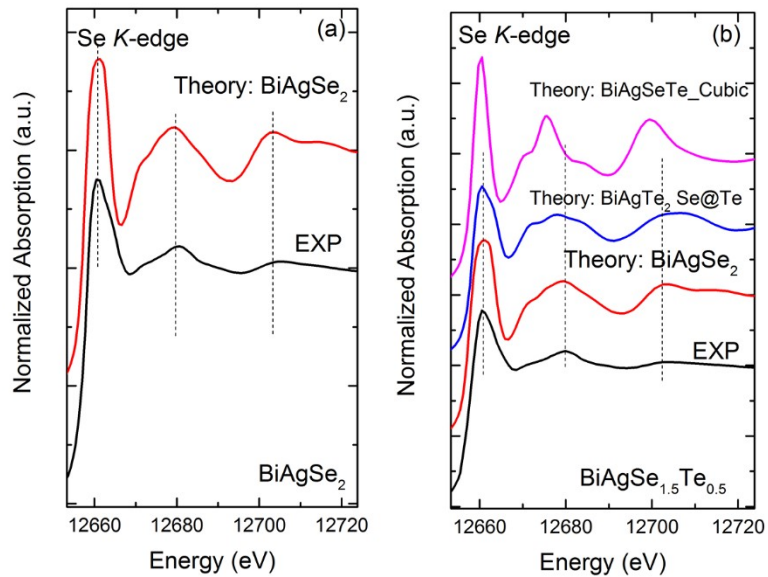

Figure.S8 Comparison of experimental and theoretical XANES spectra at Se  $K$ -edge for (a)  $\text{BiAgSe}_2$  (b)  $\text{BiAgSe}_{1.5}\text{Te}_{0.5}$ . Note that hexagonal structures were used  $\text{BiAgSe}_2$  and  $\text{BiAgTe}_2$  models while cubic structure was used for  $\text{BiAgSeTe}$ .



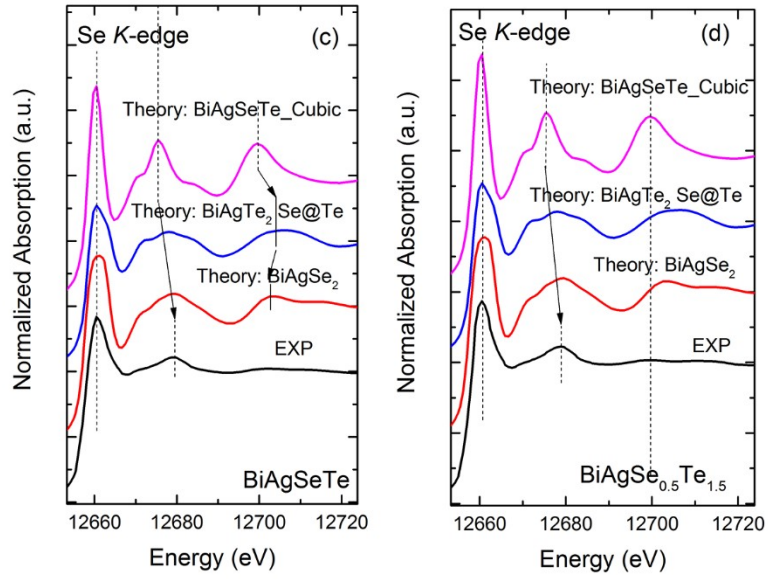

Figure.S9 Comparison of experimental and theoretical XANES spectra at Se *K*-edge for (a) BiAgSeTe (b) BiAgSe<sub>0.5</sub>Te<sub>1.5</sub>. Note that hexagonal structures were used BiAgSe<sub>2</sub> and BiAgTe<sub>2</sub> models while cubic structure was used for BiAgSeTe.

**Table.S2.** The electron number counts for *s*, *p*, *d* electrons and the differentially calculated charge transfer<sup>1</sup> as retrieved from the full multiple scattering theory calculations using FEFF9.0 code.

| BiAgSe <sub>2</sub>       | S     | P     | D      | CT     | BiAgTe <sub>2</sub>       | S     | P     | D      | CT     |
|---------------------------|-------|-------|--------|--------|---------------------------|-------|-------|--------|--------|
| <b>Ag L<sub>3</sub></b>   |       |       |        |        | <b>Ag L<sub>3</sub></b>   |       |       |        |        |
| Ag                        | 0.731 | 0.518 | 9.879  | -0.128 | Ag                        | 0.812 | 0.555 | 9.859  | -0.225 |
| Bi                        | 1.936 | 2.173 | 10.489 | 0.402  | Bi                        | 1.923 | 2.313 | 10.445 | 0.321  |
| Se                        | 1.977 | 3.868 | 0.293  | -0.137 | Te                        | 1.952 | 3.684 | 0.412  | -0.048 |
| <b>BiAgSe<sub>2</sub></b> |       |       |        |        | <b>BiAgTe<sub>2</sub></b> |       |       |        |        |
| <b>Bi L<sub>3</sub></b>   | S     | P     | D      | CT     | <b>Bi L<sub>3</sub></b>   | S     | P     | D      | CT     |
| Ag                        | 0.725 | 0.519 | 9.879  | -0.123 | Ag                        | 0.798 | 0.547 | 9.859  | -0.204 |
| Bi                        | 1.936 | 2.172 | 10.490 | 0.402  | Bi                        | 1.924 | 2.291 | 10.455 | 0.328  |
| Se                        | 1.976 | 3.859 | 0.305  | -0.140 | Te                        | 1.956 | 3.698 | 10.409 | -0.063 |
| <b>BiAgSe<sub>2</sub></b> |       |       |        |        | <b>BiAgTe<sub>2</sub></b> |       |       |        |        |
| <b>Se L<sub>3</sub></b>   | S     | P     | D      | CT     | <b>Te L<sub>3</sub></b>   | S     | P     | D      | CT     |
| Ag                        | 0.745 | 0.503 | 9.879  | -0.128 | Ag                        | 0.823 | 0.539 | 9.860  | -0.221 |
| Bi                        | 1.939 | 2.148 | 10.482 | 0.432  | Bi                        | 1.925 | 2.288 | 10.441 | 0.346  |
| Se                        | 1.977 | 3.885 | 0.291  | -0.153 | Te                        | 1.951 | 3.704 | 0.407  | -0.063 |
| <b>BiAgSeT</b>            |       |       |        |        | <b>BiAgSeT</b>            |       |       |        |        |
| <b>e</b>                  | S     | P     | D      | CT     | <b>e</b>                  | S     | P     | D      | CT     |
| <b>Ag L<sub>3</sub></b>   |       |       |        |        | <b>Te L<sub>3</sub></b>   |       |       |        |        |
| Bi                        | 1.902 | 2.721 | 10.251 | 0.125  | Bi                        | 1.968 | 2.128 | 10.366 | 0.536  |
| Ag                        | 0.590 | 0.546 | 9.835  | 0.029  | Ag                        | 0.594 | 0.535 | 9.830  | 0.042  |

|    |       |       |       |        |    |       |       |       |        |
|----|-------|-------|-------|--------|----|-------|-------|-------|--------|
| Se | 1.970 | 4.112 | 0.185 | -0.266 | Se | 1.972 | 4.143 | 0.193 | -0.309 |
| Te | 1.921 | 3.676 | 0.293 | 0.111  | Te | 1.929 | 3.778 | 0.298 | -0.004 |

**Table.S3 EXAFS fitting results for different structural models at the Bi  $L_3$ -edge**

CN: coordination number, R: bond distance,  $\sigma^2$ : means square relative displacement,  $\Delta E$ : energy shift; R-factor: fitting quality

| Samples                                              | Path   | CN  | R             | $\sigma^2 (\times 10^3)$ | $\Delta E$ | R-factor |
|------------------------------------------------------|--------|-----|---------------|--------------------------|------------|----------|
| BiAgSe <sub>2</sub> -Bi <sub>2</sub> Se <sub>3</sub> | Bi-Se1 | 3.0 | 2.8670±0.0889 | 11.3±11.0                | 5.6±4.7    | 0.02     |
|                                                      | Bi-Se2 | 2.7 | 3.0748±0.1308 | 13.0±5.5                 | 5.6±4.7    |          |
| BiAgSe <sub>2</sub> - $\beta$ -phase                 | Bi-Se  | 1.9 | 2.7923±0.0336 | 12.0±4.6                 | -9.9±5.2   | 0.06     |
| BiAgSeTe- Bi <sub>2</sub> Se <sub>3</sub>            | Bi-Se1 | 0.8 | 2.8971±0.1890 | 31.3±7.2                 | 18.6±15.1  | 0.31     |
|                                                      | Bi-Se2 | 0.9 | 3.1330±0.4263 | 75.4±17.1                | 18.6±15.1  |          |

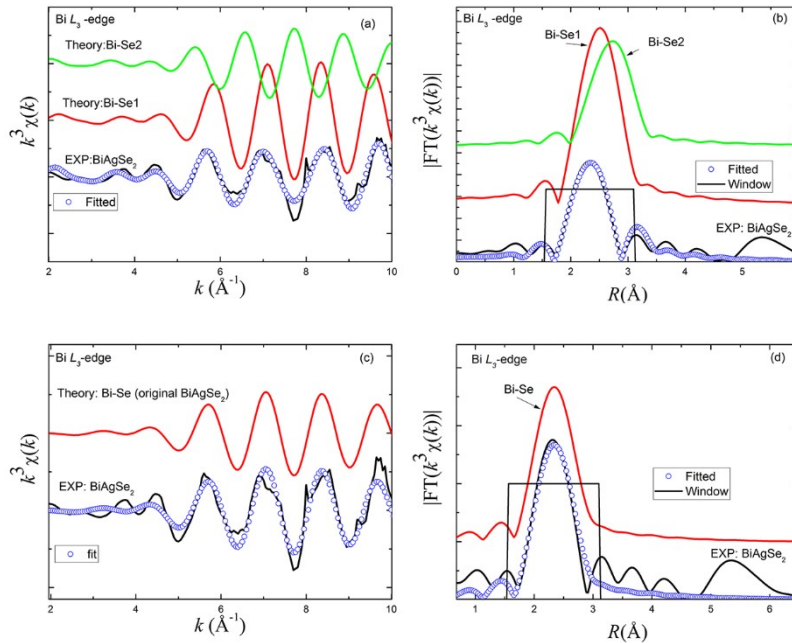

Figure.S10 Best fit of the Bi  $L_3$ -edge EXAFS of BiAgSe<sub>2</sub> in k-space (left panel) and R-space (right panel) by using (a, b) distorted model structure with two Bi-Se bond lengths and (c,d) the original hexagonal with one Bi-Se bond lengths

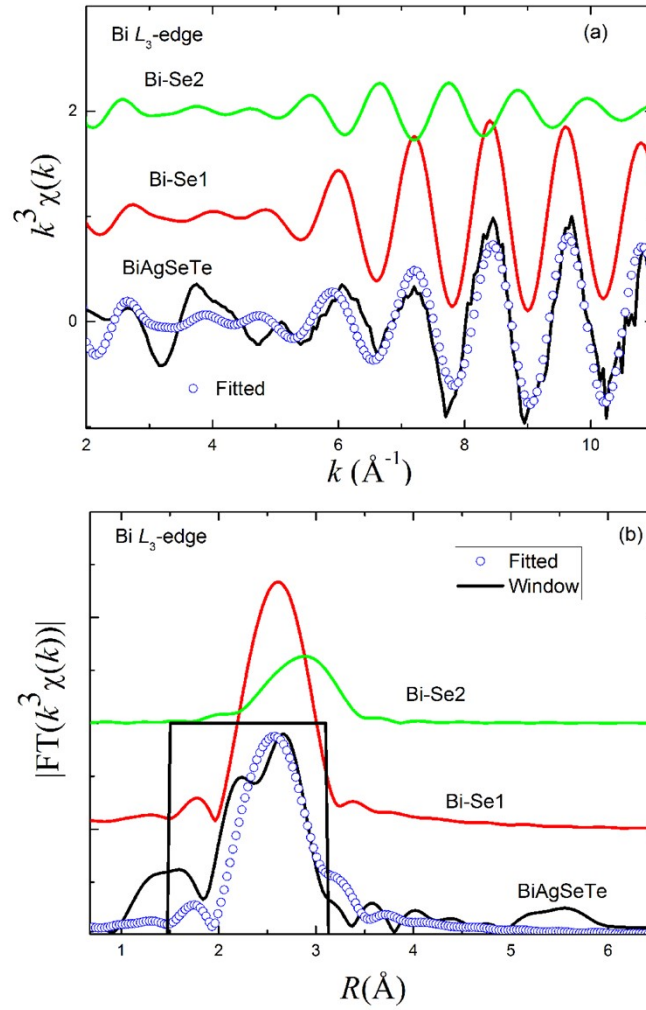

Figure.S11 Best fit of the Bi  $L_3$ -edge EXAFS of BiAgSeTe in k-space (a) and R-space (b) by using distorted model structure with two Bi-Se bond lengths

**Table.S4 EXAFS fitting results for different structural models at the Se K-edge**

| <b>BiAgSe<sub>2</sub></b>                                                                                                                  | <b>Path</b> | <b>CN</b> | <b>R</b>            | <b><math>\sigma^2 (\times 10^{-3})</math></b> | <b><math>\Delta E</math></b> | <b>R-factor</b> |
|--------------------------------------------------------------------------------------------------------------------------------------------|-------------|-----------|---------------------|-----------------------------------------------|------------------------------|-----------------|
| <b><math>k^3</math> weighted,<br/>k range <math>\in (2.0-9.7) \text{ \AA}^{-1}</math><br/>R range <math>\in (1.5-3) \text{ \AA}</math></b> |             |           |                     |                                               |                              |                 |
| <b>BiAgSe<sub>2</sub>-<math>\beta</math>-phase</b>                                                                                         | Se-Ag       | 2.7       | 2.7407 $\pm$ 0.0889 | 26.59 $\pm$ 11.0                              | 1.3 $\pm$ 1.1                | 0.04            |
|                                                                                                                                            | Se-Bi       | 2.3       | 2.8656 $\pm$ 0.1308 | 17.0 $\pm$ 5.5                                | 1.3 $\pm$ 1.1                |                 |
| <b>BiAgSeTe</b>                                                                                                                            | <b>Path</b> | <b>CN</b> | <b>R</b>            | <b><math>\sigma^2 (\times 10^{-3})</math></b> | <b><math>\Delta E</math></b> | <b>R-factor</b> |
| <b><math>k^3</math> weighted,<br/>k range <math>\in (2.0-11) \text{ \AA}^{-1}</math><br/>R range <math>\in (1-3) \text{ \AA}</math></b>    |             |           |                     |                                               |                              |                 |

|                                                                                                                           |       |     |               |                                     |         |          |
|---------------------------------------------------------------------------------------------------------------------------|-------|-----|---------------|-------------------------------------|---------|----------|
| <b>BiAgSe<sub>2</sub>-β-phase</b>                                                                                         | Se-Ag | 0.3 | 2.6471±0.0482 | 12.3±6.3                            | 2.4±0.2 | 0.14     |
|                                                                                                                           | Se-Bi | 2.5 | 2.8020±0.0817 | 25.6±17.8                           | 2.4±0.2 |          |
| <b>BiAgSeTe</b><br><b>k<sup>3</sup> weighted,</b><br><b>k range ∈ (2.0-11) Å<sup>-1</sup></b><br><b>R range ∈ (1-3) Å</b> | Path  | CN  | R             | σ <sup>2</sup> (×10 <sup>-3</sup> ) | ΔE      | R-factor |
| <b>BiAgSe<sub>2</sub>-γ-phase</b>                                                                                         | Bi-Se | 0.4 | 2.8169±0.02   | 5.3±1.8                             | 4.7±2.4 | 0.07     |
|                                                                                                                           | Bi-Te | 1.4 | 2.9926±0.07   | 21.7±6.1                            |         |          |

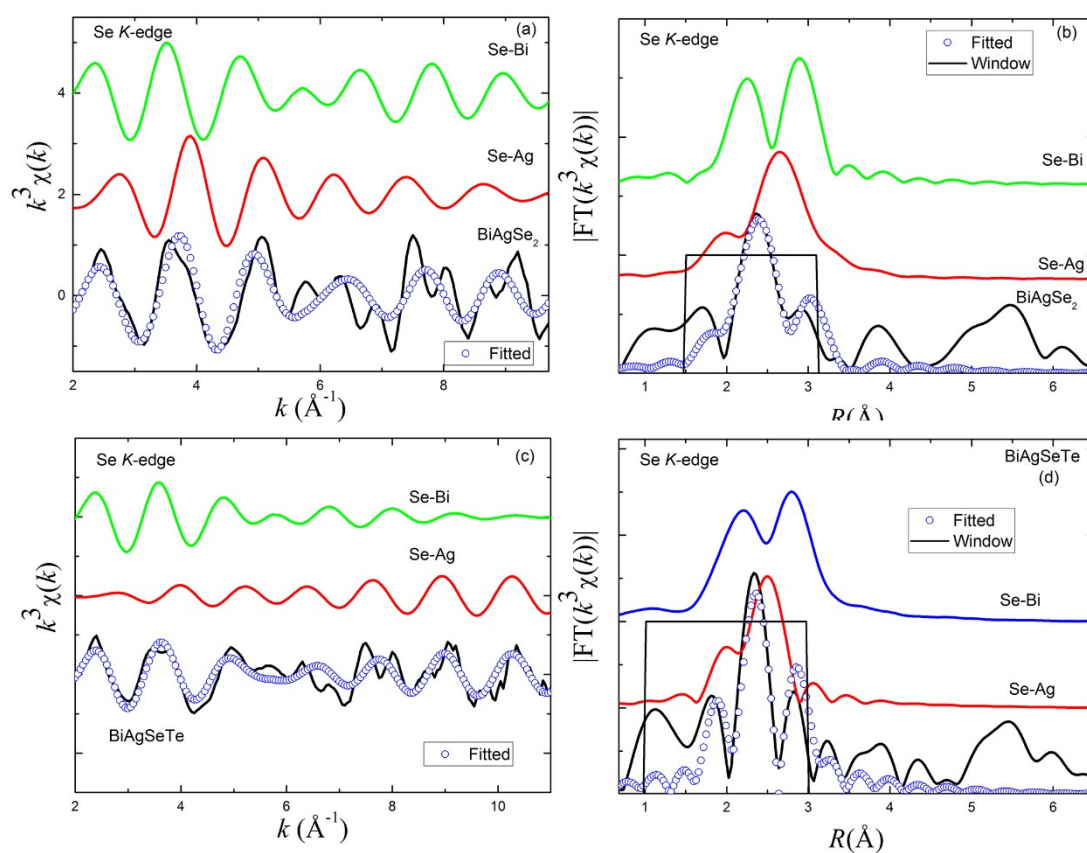

Figure.S12 Best fit of the Se K-edge EXAFS of BiAgSe<sub>2</sub> (a) in k-space and (b) R-space and that of BiAgSeTe (c) in k-space and (d) R-space

## References

1. Ankudinov, A. L.; Ravel, B.; Rehr, J. J.; Conradson, S. D., Real-space multiple-scattering calculation and interpretation of x-ray-absorption near-edge structure. *Phys. Rev. B* **1998**, *58* (Copyright (C) 2009 The American Physical Society), 7565.
